# Supplementary material for: Catalytic Activity of Thermolyzed [Co(NH3)6][Fe(CN)6] in CO Hydrogenation Reaction
Source: MDPI journal article supplement (doi:10.3390/molecules26133782), 2021-06-22
Supplement: s1 [file s1]

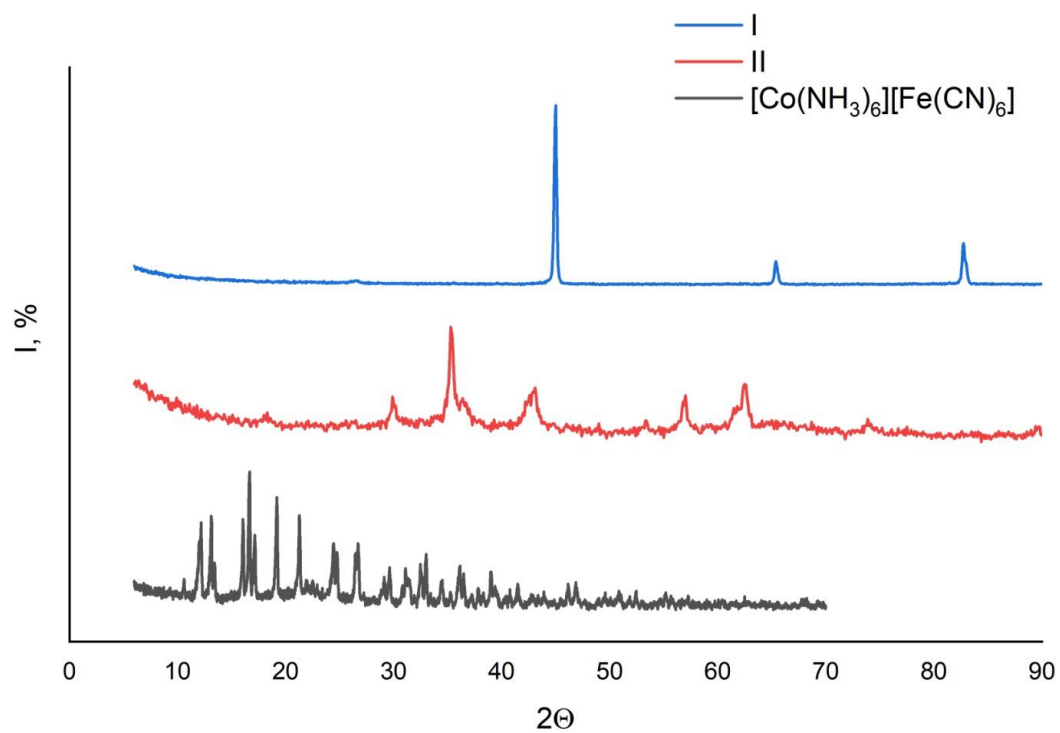

**Figure S1.** Powder X-ray diffraction patterns of  $[\text{Co}(\text{NH}_3)_6][\text{Fe}(\text{CN})_6]$  and catalytic compositions.

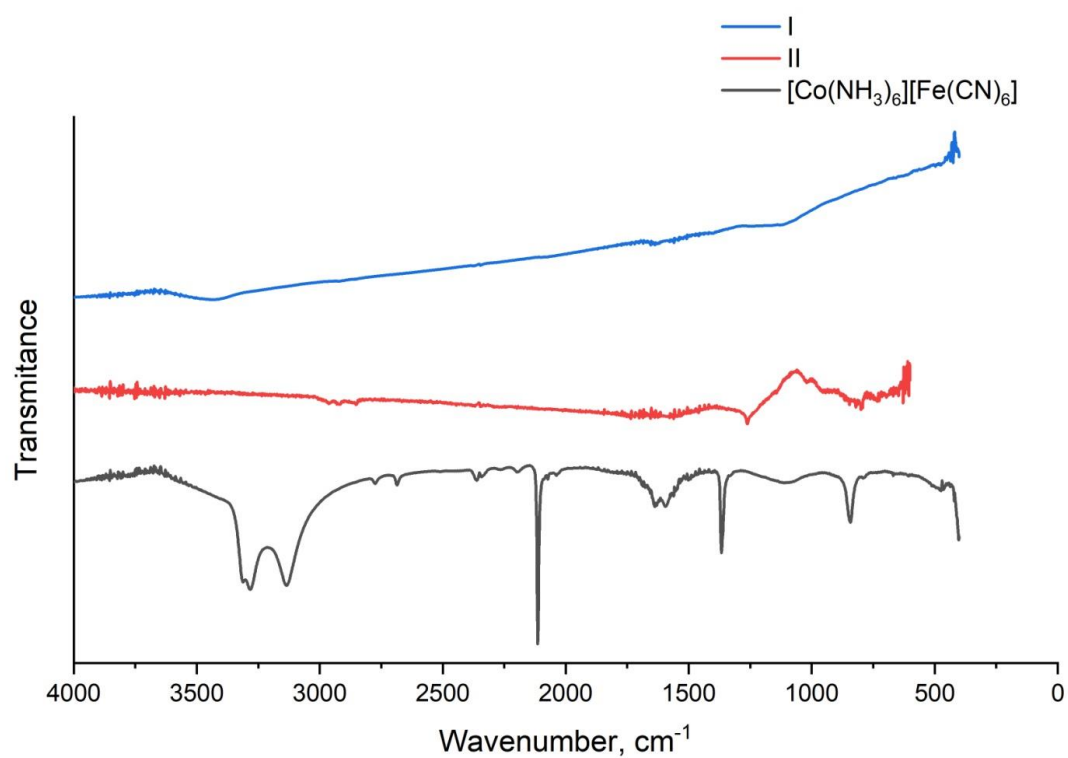

**Figure S2.** IR spectra of  $[\text{Co}(\text{NH}_3)_6][\text{Fe}(\text{CN})_6]$  and catalytic compositions.
